# Supplementary material for: Glyma11g13220, a homolog of the vernalization pathway gene VERNALIZATION 1 from soybean [Glycine max (L.) Merr.], promotes flowering in Arabidopsis thaliana
Source: PubMed Central journal article supplement (PMC4588262; doi:10.1186/s12870-015-0602-6), 2015-09-29
Supplement: 12870_2015_602_MOESM3_ESM.pdf [file 12870_2015_602_MOESM3_ESM.pdf]

Initial flowering dates of soybean plants

|     | SD         | LD           | NT         | LTT          |
|-----|------------|--------------|------------|--------------|
| HC5 | 29.33±1.97 | 53.67±0.75** | 29.67±1.70 | 38.83±1.21** |
